# Supplementary material for: Correction: Cyclooxygenase pathway mediates the inhibition of Na-glutamine co-transporter B0AT1 in rabbit villus cells during chronic intestinal inflammation
Source: PubMed Central journal article supplement (PMC10635497; doi:10.1371/journal.pone.0294387), 2023-11-09

**B0AT1-Experiment 1 (representative Blot in Figure 4)**

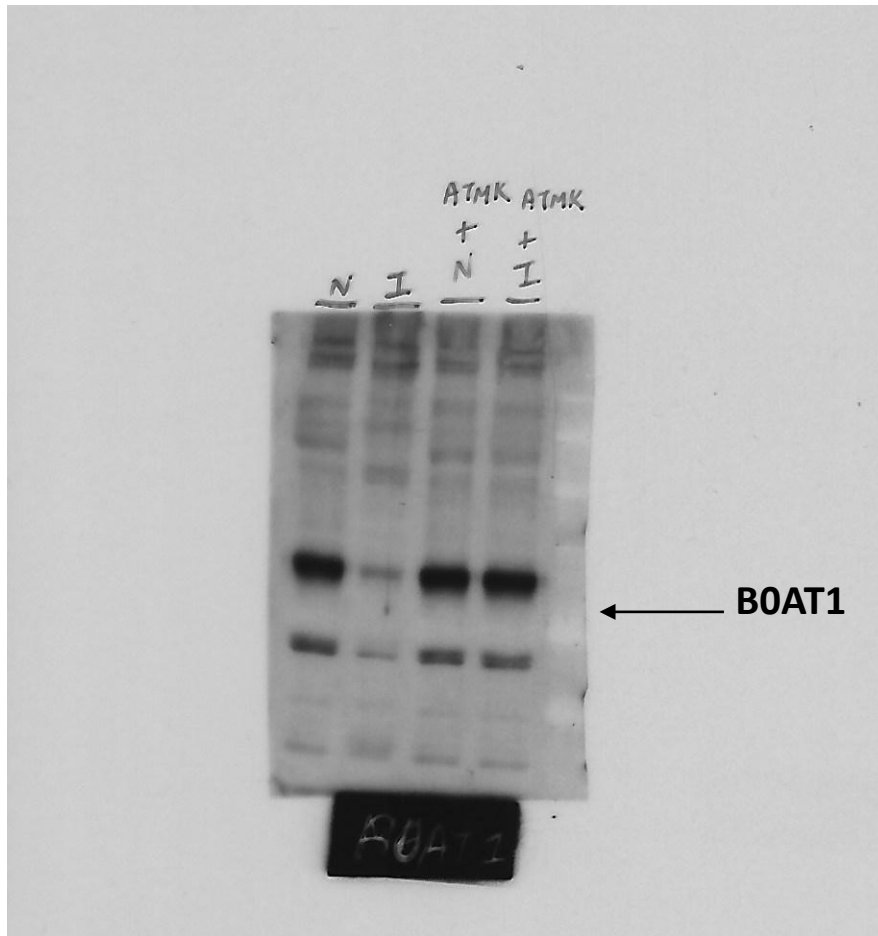

**Ezrin-Experiment 1 (Representative blot in Figure 4)**

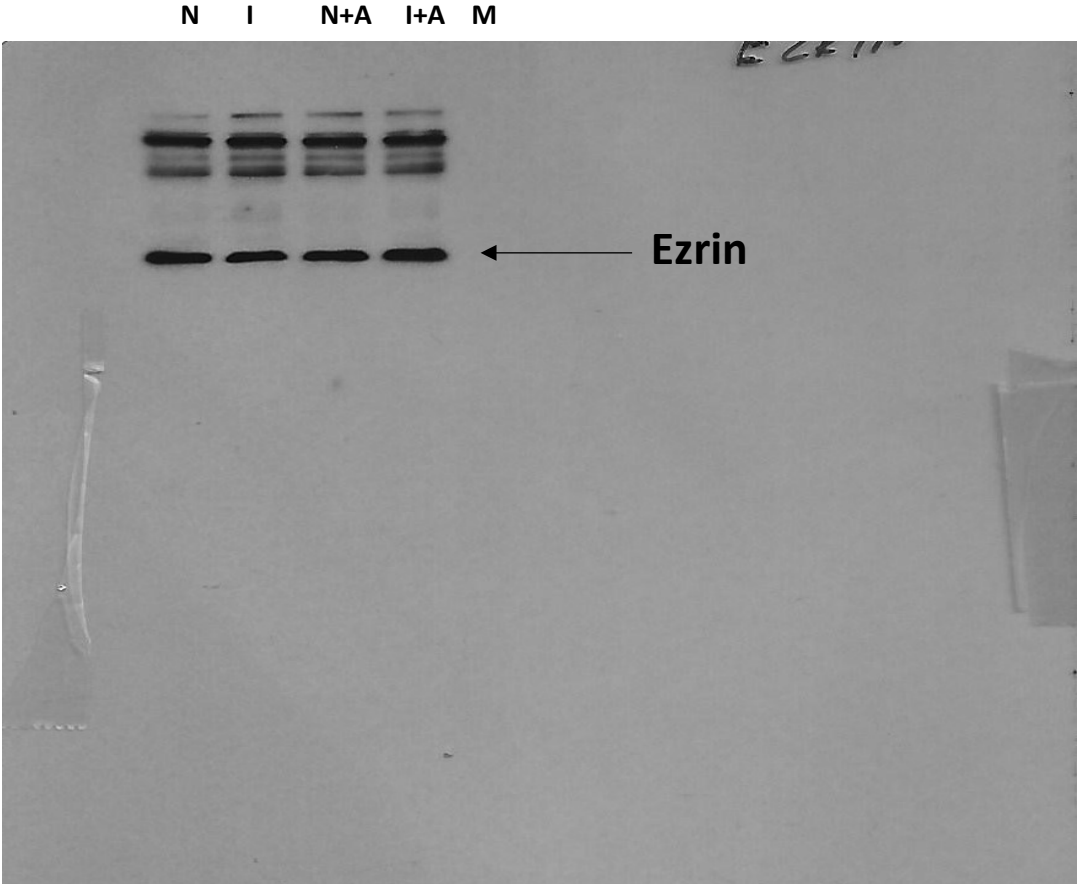

### BOAT1-Experiment 2 and 3

M N I N+A I+A N I N+A I+A M

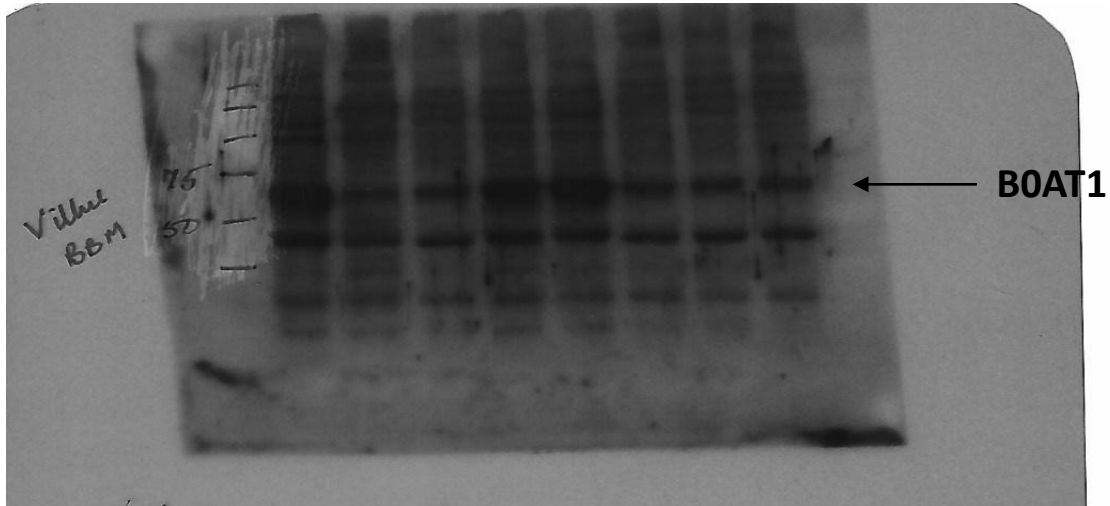

### Ezrin-Experiment 2 and 3

N I N+A I+A N I N+A I+A M

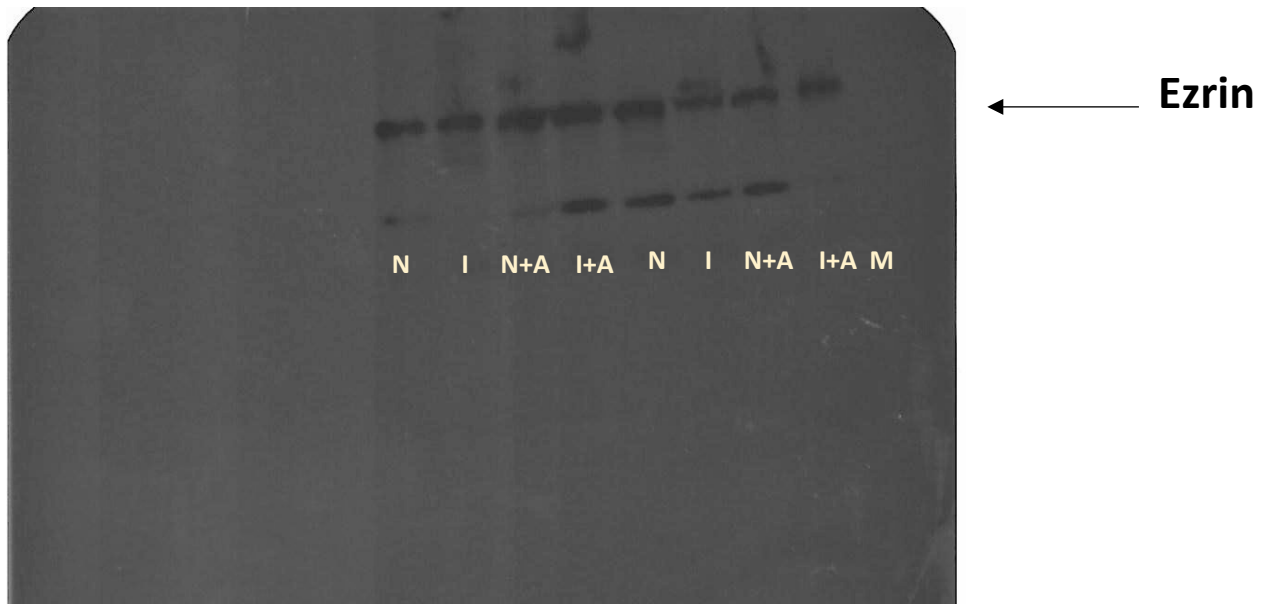

Supplement: pone.0294387.s001.pdf [file pone.0294387.s001.pdf]
