# Supplementary material for: Correction: Cyclooxygenase pathway mediates the inhibition of Na-glutamine co-transporter B0AT1 in rabbit villus cells during chronic intestinal inflammation
Source: PubMed Central journal article supplement (PMC10635497; doi:10.1371/journal.pone.0294387), 2023-11-09

**BOAT1-Experiment 4 and 5**

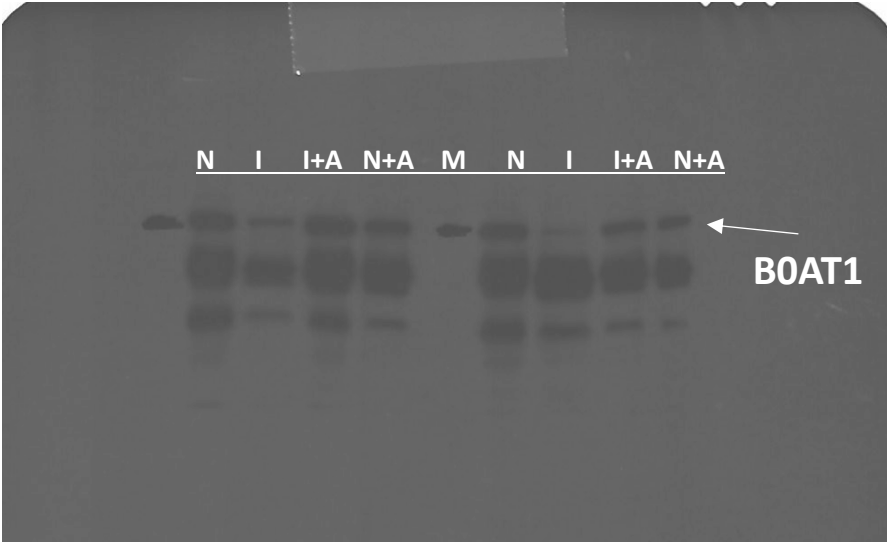

**Ezrin-Experiment 4 and 5**

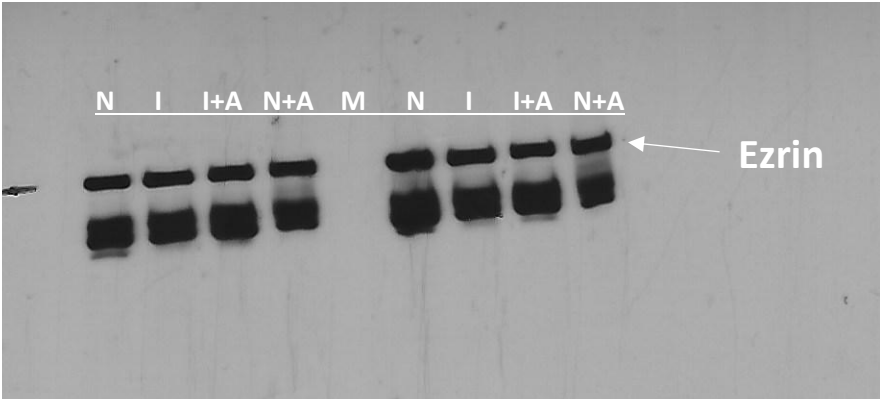

Supplement: pone.0294387.s002.pdf [file pone.0294387.s002.pdf]
