# Supplementary material for: Correction: Cyclooxygenase pathway mediates the inhibition of Na-glutamine co-transporter B0AT1 in rabbit villus cells during chronic intestinal inflammation
Source: PubMed Central journal article supplement (PMC10635497; doi:10.1371/journal.pone.0294387), 2023-11-09
Supplement: pone.0294387.s003.pdf [file pone.0294387.s003.pdf]

| Experiment 1: B0AT1 |                          |                                           | Experiment 1: Ezrin |                          |                                           |
|---------------------|--------------------------|-------------------------------------------|---------------------|--------------------------|-------------------------------------------|
|                     | Integrated density value | Net protein (after removal of background) |                     | Integrated density value | Net Loading (after removal of background) |
|                     |                          | %                                         |                     |                          | %                                         |
| Normal              | 19204035                 | 30.4                                      | Normal              | 13894591                 | 25.1                                      |
| Inflamed            | 7612788                  | 12                                        | Inflamed            | 14021880                 | 25.3                                      |
| N+ATK               | 19085579                 | 30.2                                      | N+ATK               | 13749629                 | 24.8                                      |
| I+ATK               | 17304232                 | 27.4                                      | I+ATK               | 13791563                 | 24.9                                      |

net protein/net loading

|          |      |
|----------|------|
| 1.211155 | 1.00 |
| 0.474308 | 0.39 |
| 1.217742 | 1.01 |
| 1.100402 | 0.91 |

| Experiment 2: B0AT1 |                          |      |
|---------------------|--------------------------|------|
|                     | Integrated density value | %    |
| Normal              | 1820936                  | 26.9 |
| Inflamed            | 1207894                  | 17.9 |
| N+ATK               | 1927106                  | 28.5 |
| I+ATK               | 1804838                  | 28.7 |

| Experiment 2: Ezrin |                          |      |
|---------------------|--------------------------|------|
|                     | Integrated density value | %    |
| Normal              | 6190952                  | 26   |
| Inflamed            | 6046769                  | 25.4 |
| N+ATK               | 5918602                  | 24.9 |
| I+ATK               | 5610872                  | 23.6 |

|          |      |
|----------|------|
| 1.034615 | 1.00 |
| 0.704724 | 0.68 |
| 1.144578 | 1.11 |
| 1.216102 | 1.18 |

| Experiment 3: B0AT1 |                          |      |
|---------------------|--------------------------|------|
|                     | Integrated density value | %    |
| Normal              | 3993224                  | 26.4 |
| Inflamed            | 2620552                  | 17.3 |
| N+ATK               | 4101358                  | 27.1 |
| I+ATK               | 4434369                  | 29.3 |

| Experiment 3: Ezrin |                          |      |
|---------------------|--------------------------|------|
|                     | Integrated density value | %    |
| Normal              | 6186432                  | 22.2 |
| Inflamed            | 7050057                  | 25.3 |
| N+ATK               | 6972596                  | 25   |
| I+ATK               | 7641734                  | 27.4 |

|          |      |
|----------|------|
| 1.189189 | 1.00 |
| 0.683794 | 0.58 |
| 1.084    | 0.91 |
| 1.069343 | 0.90 |

All 5 Experiments

|            | I               | N+ATK           | I+ATK           |
|------------|-----------------|-----------------|-----------------|
|            | 0.39            | 1.01            | 0.91            |
|            | 0.68            | 1.11            | 1.18            |
|            | 0.58            | 0.91            | 0.9             |
|            | 0.44            | 0.93            | 1.06            |
|            | 0.34            | 0.83            | 0.97            |
| <b>Avg</b> | <b>0.486</b>    | <b>0.958</b>    | <b>1.004</b>    |
| <b>SEM</b> | <b>0.062897</b> | <b>0.047582</b> | <b>0.052402</b> |

| Experiment 4: B0AT1 |                          |      |
|---------------------|--------------------------|------|
|                     | Integrated density value | %    |
| Normal              | 6396642                  | 29.5 |
| Inflamed            | 2748838                  | 12.7 |
| N+ATK               | 6095586                  | 28.1 |
| I+ATK               | 6420277                  | 29.6 |

| Experiment 4: Ezrin |                          |      |
|---------------------|--------------------------|------|
|                     | Integrated density value | %    |
| Normal              | 39876277                 | 25.4 |
| Inflamed            | 38975380                 | 24.8 |
| N+ATK               | 40695552                 | 25.9 |
| I+ATK               | 37651054                 | 24   |

|          |      |
|----------|------|
| 1.161417 | 1.00 |
| 0.512097 | 0.44 |
| 1.084942 | 0.93 |
| 1.233333 | 1.06 |

| Experiment 5: B0AT1 |                          |      |
|---------------------|--------------------------|------|
|                     | Integrated density value | %    |
| Normal              | 5189484                  | 32.2 |
| Inflamed            | 1727303                  | 10.7 |
| N+ATK               | 4554821                  | 28.3 |
| I+ATK               | 4630301                  | 28.8 |

| Experiment 5: Ezrin |                          |      |
|---------------------|--------------------------|------|
|                     | Integrated density value | %    |
| Normal              | 35908999                 | 25.2 |
| Inflamed            | 35442761                 | 24.9 |
| N+ATK               | 37847762                 | 26.6 |
| I+ATK               | 33020598                 | 23.2 |

|          |      |
|----------|------|
| 1.277778 | 1.00 |
| 0.429719 | 0.34 |
| 1.06391  | 0.83 |
| 1.241379 | 0.97 |
